# Supplementary material for: Structural and Functional Characterization of Lipoxygenases from Diatoms by Bioinformatics and Modelling Studies
Source: MDPI journal article supplement (doi:10.3390/biom14030276), 2024-02-25
Supplement: s1 [file s1]

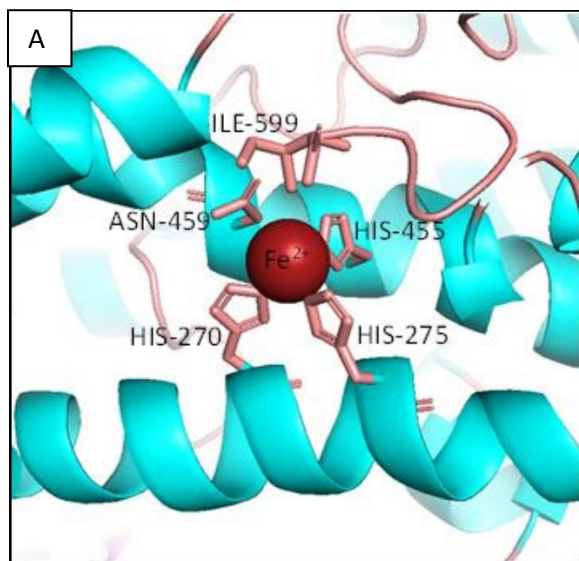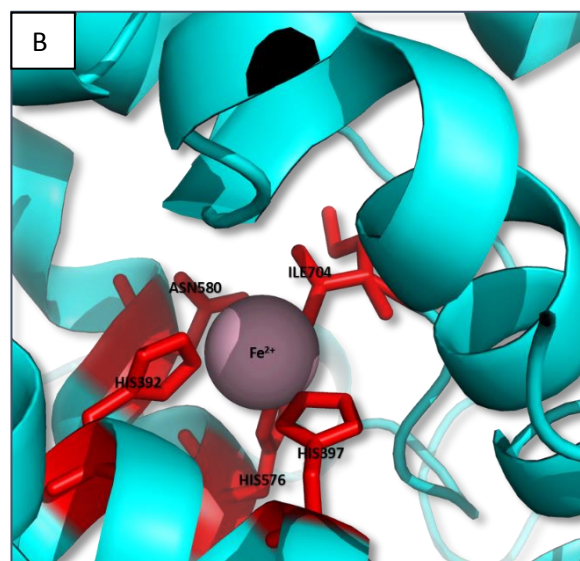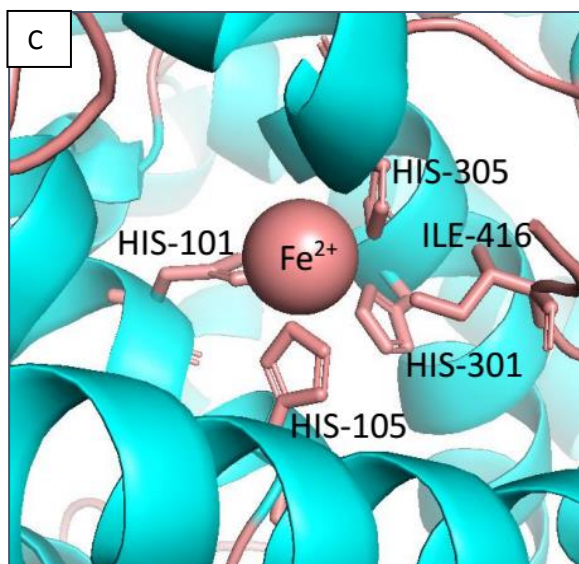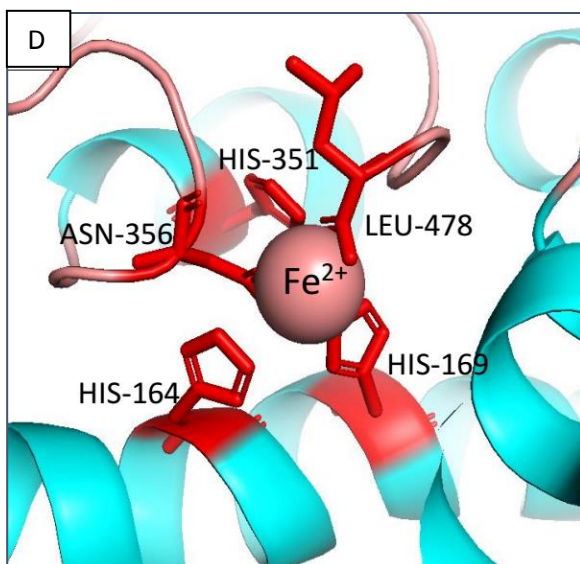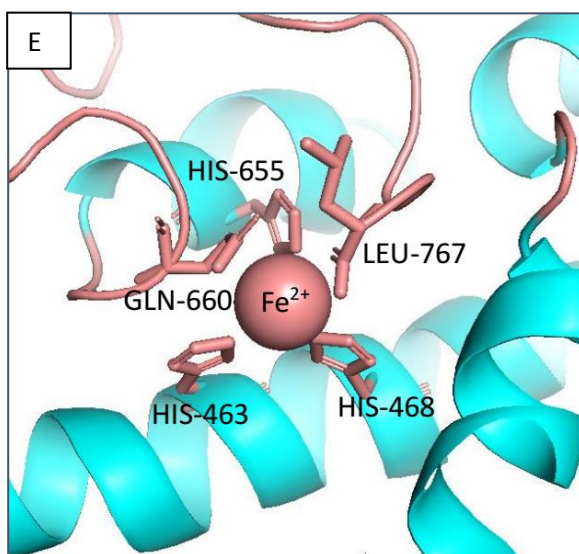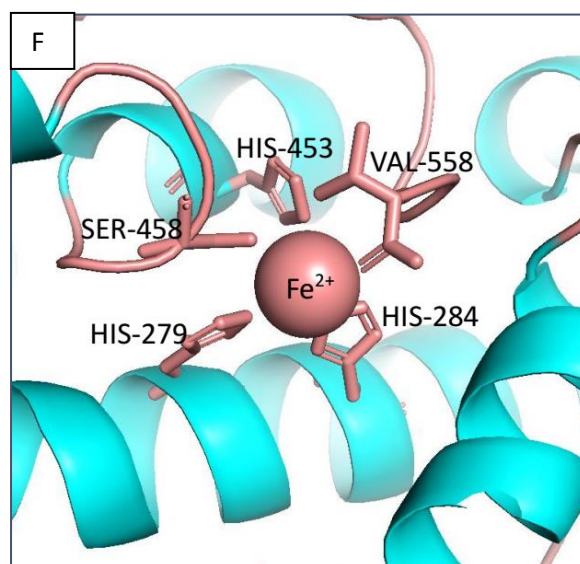

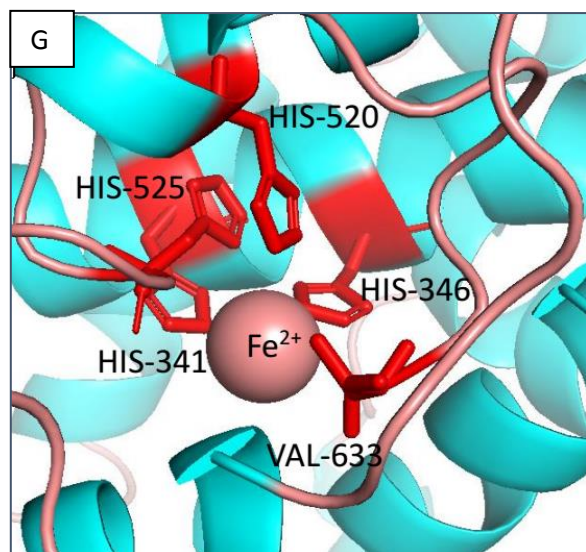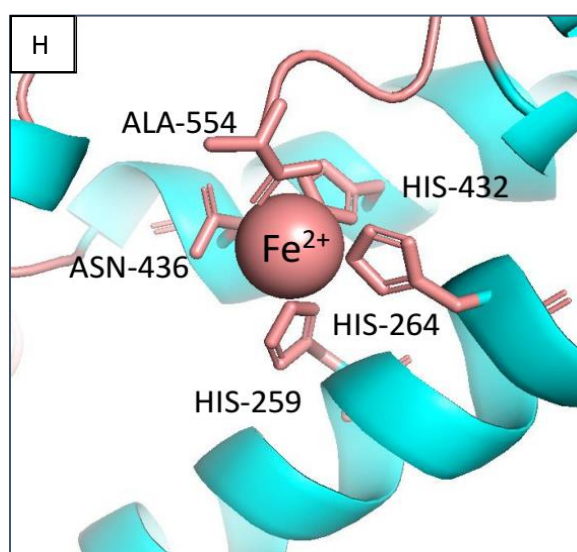

**Supplementary Figure S3.** 3D structural conformation of the cofactor coordination residues present in the structure of LOXs from *S. marinoi* (A), *P. arenysensis* (B), *P. tricornutu* (C), *F. cylindrus* (D), *A. glacialis* (E), *Bellerochea sp.* (F), *C. debilis* (G), and from *P. dubia* (H).
