# Supplementary material for: Structural and Functional Characterization of Lipoxygenases from Diatoms by Bioinformatics and Modelling Studies
Source: MDPI journal article supplement (doi:10.3390/biom14030276), 2024-02-25
Supplement: s1 [file s1]

**Supplementary Table S2.** List of the 45 sequences found to be similar to LOXs from *P. arenysensis* or *F. cylindrus*. Sequences have been divided in six groups according to their cofactor coordination residues pattern and their placement in the phylogenetic tree (Figure 1 in the manuscript). Particularly, the same background color presents in each line of the same group corresponds to the clustering of these sequences under the same branch in the tree; color highlighting each NCBI Entry code corresponds to the color label present for these sequences in the tree, that is related to a similar residues' composition of the iron coordination pattern.

| Entry NCBI      | Entry UniProt | Organism of origin                  | Sequence type | Sequence length | Iron coordination pattern |
|-----------------|---------------|-------------------------------------|---------------|-----------------|---------------------------|
| <b>GROUP I</b>  |               |                                     |               |                 |                           |
| CAD9618313      | A0A7S2LXV6    | <i>Skeletonema marinoi</i>          | protein       | 599             | Hlgkth – HaavN            |
| CAE1959045      |               | <i>Skeletonema costatum</i>         | protein       | 955             | Hlgkth – HaavN            |
| HBOY01017335    |               | <i>Skeletonema dohrnii</i>          | RNA           | 566             | HlgntH – HaavN            |
| HBLG01015303    |               | <i>Skeletonema grethae</i>          | RNA           | 637             | HlgntH – HaavN            |
| CAE2245853      | A0A7S4J0G1    | <i>Odontella aurita</i>             | protein       | 219             | HlgntH                    |
| HBLJ01006463    |               | <i>Skeletonema japonicum</i>        | RNA           | 515             | HlgntH – HaavN            |
| HBQM01026246    |               | <i>Minidiscus sp.</i>               | RNA           | 491             | HlgetH – HaavN            |
| CAE4882500      |               | <i>Ditylum brightwellii</i>         | protein       | 752             | HlgntH – HaavN            |
| HBJS01002470    |               | <i>Detonula confervacea</i>         | RNA           | 553             | HlgdtH – HaavN            |
| HBPL01043054    |               | <i>Thalassiosira antarctica</i>     | RNA           | 559             | HlgdtH – HaavN            |
| CAG1089053      |               | <i>Aulacoseira subarctica</i>       | protein       | 724             | HlgrtH – HaavN            |
| <b>GROUP II</b> |               |                                     |               |                 |                           |
| HBGY01034511    |               | <i>Leptocylindrus danicus</i>       | RNA           | 612             | HlantH – HagvN            |
| CAE0708802      | A0A7S4EF52    | <i>Pseudo-nitzschia australis</i>   | protein       | 698             | HlgmtH – HaaiN            |
| QWC64745        | A0A8E8LBZ9    | <i>Pseudo-nitzschia arenysensis</i> | protein       | 704             | HlgmtH – HaavN            |
| CAE4404401      |               | <i>Chaetoceros affinis</i>          | protein       | 519             | HlamtH – HcavN            |

|                  |            |                                    |         |      |                 |
|------------------|------------|------------------------------------|---------|------|-----------------|
| CAE3781055       |            | <i>Stauroneis constricta</i>       | protein | 761  | HlgktH – HaavN  |
| GJGQ01026673     |            | <i>Craspedostauros australis</i>   | RNA     | 506  | HlgktH – HaavN  |
| CAD8937191       | A0A7S1D4P1 | <i>Cyclophora tenuis</i>           | protein | 778  | HlgntH – HaavN  |
| CAE2664940       |            | <i>Astrosyne radiata</i>           | protein | 359  | HlgrtH – HaavN  |
| CAE5663449       |            | <i>Fragilariopsis kerguelensis</i> | protein | 712  | HlaktH – HaavN  |
| <b>GROUP III</b> |            |                                    |         |      |                 |
| XP_002180840     | B7G1E2     | <i>Phaeodactylum tricornutum</i>   | protein | 596  | HswvH – HstdH   |
| HBME01023157     |            | <i>Synedropsis cf. recta</i>       | RNA     | 588  | HswvH – HstdH   |
| CAD8884873       | A0A7S1BET1 | <i>Corethron hystrix</i>           | protein | 569  | HatiH and HgatI |
| <b>GROUP IV</b>  |            |                                    |         |      |                 |
| CAD9818490       | A0A7S2UJH2 | <i>Attheya septentrionalis</i>     | protein | 1378 | HlvnvH – HelvgQ |
| GHBX01011490     |            | <i>Nitzschia palea</i>             | RNA     | 448  | HlvnvH – HelvgQ |
| CAD8595700       | A0A7S0KYY3 | <i>Asterionellopsis glacialis</i>  | protein | 767  | HlghcH – HehvgQ |
| OEU18547         | A0A1E7FK81 | <i>Fragilariopsis cylindrus</i>    | protein | 742  | HlleIH – HnlvaN |
| HBQV01033768     |            | <i>Synedra</i>                     | RNA     | 716  | HllevH – HnvvaN |
| HBSF01004517     |            | <i>uncultured Nitzschia</i>        | RNA     | 360  | HlleIH – HnlvaN |
| CAE3758544       |            | <i>Chaetoceros cf. neogracilis</i> | protein | 735  | HlsveH – HssigN |
| <b>GROUP V</b>   |            |                                    |         |      |                 |
| GJWO01009215     |            | <i>Bellerochea sp.</i>             | RNA     | 558  | HlfnaH – HehvgS |
| HBQT01021118     |            | <i>Navicula sp.</i>                | RNA     | 511  | HlynIH – HeqvgS |
| HBRE01028634     |            | <i>Pleurosigma sp.</i>             | RNA     | 585  | HllwcH – HdlvgS |
| CAE4385921       |            | <i>Chaetoceros affinis</i>         | protein | 555  | HlvwsH – HelvgA |
| HBOX01063848     |            | <i>Proboscia alata</i>             | RNA     | 306  | HlvwsH – HeimgH |
| HBPD01019733     |            | <i>Thalassionema nitzschioides</i> | RNA     | 582  | HliwtH – HelvgH |

|                 |            |                                  |         |      |                 |
|-----------------|------------|----------------------------------|---------|------|-----------------|
| HBPJ01045426    |            | <i>Thalassiosira minuscula</i>   | RNA     | 358  | HlcqtH – HelvgH |
| CAE0460244      | A0A7S3V6L4 | <i>Chaetoceros debilis</i>       | protein | 633  | HlaqtH – Heiigh |
| GFH44228        |            | <i>Chaetoceros tenuissimus</i>   | protein | 624  | HlaqsH – Heligh |
| CAB9509299      |            | <i>Seminavis robusta</i>         | protein | 576  | HltwsH – HelvgN |
| <b>GROUP VI</b> |            |                                  |         |      |                 |
| CAD8419348      | A0A7S0CCN1 | <i>Proboscia inermis</i>         | protein | 336  | HfvysH – HhswN  |
| CAD8307630      | A0A7R9VXA5 | <i>Pseudictyota dubia</i>        | protein | 554  | HfietH – HhvmN  |
| CAE3007537      |            | <i>Stephanopyxis turris</i>      | protein | 1179 | HaltcH – HaavN  |
| CAF33213        |            | <i>Phaeodactylum tricornutum</i> | protein | 937  | Hfsrch – HaavN  |
