# Supplementary material for: Structural and Functional Characterization of Lipoxygenases from Diatoms by Bioinformatics and Modelling Studies
Source: Biomolecules. 2024 Feb 25;14(3):276. doi: 10.3390/biom14030276 (PMC10968607; doi:10.3390/biom14030276)
Supplement: Supplementary file 1 [file biomolecules-14-00276-s001.zip]

Archive with 5 entries (5 files):
- Supplementary Figure_S1.pdf
- Supplementary Figure_S2.pdf
- Supplementary Figure_S3.pdf
- Supplementary Table_S1.pdf
- Supplementary Table_S2.pdf
